# Supplementary material for: Exploring Neighborhoods in the Metagenome Universe
Source: Int J Mol Sci. 2014 Jul 14;15(7):12364–78. doi: 10.3390/ijms150712364 (PMC4139848; doi:10.3390/ijms150712364)
Supplement: Supplementary File 1 [file ijms-15-12364-s001.zip › Supplementary Dataset.csv]

Source	Accession ID	Habitat
MG-Rast	4440036.3	Virus-enriched
MG-Rast	4440037.3	Aquatic
MG-Rast	4440038.3	Aquatic
MG-Rast	4440039.3	Aquatic
MG-Rast	4440041.3	Aquatic
MG-Rast	4440052.3	Virus-enriched
MG-Rast	4440053.3	Host-associated
MG-Rast	4440054.3	Host-associated
MG-Rast	4440055.3	Aquatic
MG-Rast	4440056.3	Aquatic
MG-Rast	4440059.3	Aquatic
MG-Rast	4440060.4	Aquatic
MG-Rast	4440064.3	Aquatic
MG-Rast	4440065.3	Aquatic
MG-Rast	4440066.3	Aquatic
MG-Rast	4440067.3	Aquatic
MG-Rast	4440090.3	Aquatic
MG-Rast	4440145.4	Virus-enriched
MG-Rast	4440163.5	Aquatic
MG-Rast	4440165.5	Aquatic
MG-Rast	4440212.3	Aquatic
MG-Rast	4440213.3	Aquatic
MG-Rast	4440275.3	Aquatic
MG-Rast	4440276.3	Aquatic
MG-Rast	4440281.3	Extreme
MG-Rast	4440283.3	Host-associated
MG-Rast	4440284.3	Host-associated
MG-Rast	4440285.3	Host-associated
MG-Rast	4440286.3	Host-associated
MG-Rast	4440304.3	Aquatic
MG-Rast	4440305.3	Virus-enriched
MG-Rast	4440306.3	Aquatic
MG-Rast	4440319.3	Host-associated
MG-Rast	4440322.3	Virus-enriched
MG-Rast	4440329.3	Extreme
MG-Rast	4440360.3	Aquatic
MG-Rast	4440361.3	Aquatic
MG-Rast	4440363.3	Aquatic
MG-Rast	4440364.3	Aquatic
MG-Rast	4440371.3	Virus-enriched
MG-Rast	4440411.3	Aquatic
MG-Rast	4440413.3	Aquatic
MG-Rast	4440420.3	Aquatic
MG-Rast	4440422.3	Aquatic
MG-Rast	4440423.3	Aquatic
MG-Rast	4440425.3	Aquatic
MG-Rast	4440428.3	Virus-enriched
MG-Rast	4440430.3	Aquatic
MG-Rast	4440433.3	Aquatic
MG-Rast	4440437.3	Aquatic
MG-Rast	4440438.3	Aquatic
MG-Rast	4440463.3	Host-associated
MG-Rast	4440464.3	Host-associated
MG-Rast	4440613.3	Host-associated
MG-Rast	4440616.3	Host-associated
MG-Rast	4440939.3	Host-associated
MG-Rast	4440940.3	Host-associated
MG-Rast	4440941.3	Host-associated
MG-Rast	4440942.3	Host-associated
MG-Rast	4440943.3	Host-associated
MG-Rast	4440944.3	Host-associated
MG-Rast	4440945.3	Host-associated
MG-Rast	4440946.3	Host-associated
MG-Rast	4440947.3	Host-associated
MG-Rast	4440948.3	Host-associated
MG-Rast	4440949.3	Host-associated
MG-Rast	4440950.3	Host-associated
MG-Rast	4440951.3	Host-associated
MG-Rast	4440960.3	Aquatic
MG-Rast	4440961.3	Aquatic
MG-Rast	4440973.3	Aquatic
MG-Rast	4440984.3	Aquatic
MG-Rast	4441020.3	Aquatic
MG-Rast	4441021.3	Aquatic
MG-Rast	4441022.3	Aquatic
MG-Rast	4441041.3	Aquatic
MG-Rast	4441051.3	Aquatic
MG-Rast	4441056.3	Aquatic
MG-Rast	4441057.3	Aquatic
MG-Rast	4441057.4	Aquatic
MG-Rast	4441062.3	Aquatic
MG-Rast	4441091.3	Terrestrial
MG-Rast	4441095.3	Extreme
MG-Rast	4441096.3	Extreme
MG-Rast	4441115.3	Host-associated
MG-Rast	4441132.3	Virus-enriched
MG-Rast	4441133.3	Aquatic
MG-Rast	4441135.3	Aquatic
MG-Rast	4441137.3	Extreme
MG-Rast	4441138.3	Extreme
MG-Rast	4441139.4	Aquatic
MG-Rast	4441143.3	Aquatic
MG-Rast	4441144.3	Aquatic
MG-Rast	4441145.3	Aquatic
MG-Rast	4441146.3	Aquatic
MG-Rast	4441147.3	Aquatic
MG-Rast	4441148.3	Aquatic
MG-Rast	4441149.3	Aquatic
MG-Rast	4441150.3	Aquatic
MG-Rast	4441152.3	Aquatic
MG-Rast	4441153.3	Aquatic
MG-Rast	4441155.3	Aquatic
MG-Rast	4441156.3	Aquatic
MG-Rast	4441167.3	Aquatic
MG-Rast	4441214.3	Aquatic
MG-Rast	4441347.3	Aquatic
MG-Rast	4441363.3	Aquatic
MG-Rast	4441570.3	Aquatic
MG-Rast	4441572.3	Aquatic
MG-Rast	4441574.3	Aquatic
MG-Rast	4441575.3	Aquatic
MG-Rast	4441576.3	Aquatic
MG-Rast	4441577.3	Virus-enriched
MG-Rast	4441578.3	Aquatic
MG-Rast	4441579.3	Aquatic
MG-Rast	4441580.3	Aquatic
MG-Rast	4441581.3	Aquatic
MG-Rast	4441582.3	Aquatic
MG-Rast	4441583.3	Aquatic
MG-Rast	4441584.3	Aquatic
MG-Rast	4441585.3	Aquatic
MG-Rast	4441586.3	Aquatic
MG-Rast	4441587.3	Aquatic
MG-Rast	4441588.3	Aquatic
MG-Rast	4441589.3	Aquatic
MG-Rast	4441590.3	Aquatic
MG-Rast	4441591.3	Aquatic
MG-Rast	4441592.3	Aquatic
MG-Rast	4441593.3	Aquatic
MG-Rast	4441594.3	Aquatic
MG-Rast	4441595.3	Aquatic
MG-Rast	4441596.3	Aquatic
MG-Rast	4441596.4	Aquatic
MG-Rast	4441597.3	Aquatic
MG-Rast	4441598.3	Aquatic
MG-Rast	4441599.3	Aquatic
MG-Rast	4441600.3	Aquatic
MG-Rast	4441601.3	Aquatic
MG-Rast	4441602.3	Aquatic
MG-Rast	4441603.3	Aquatic
MG-Rast	4441604.3	Aquatic
MG-Rast	4441605.3	Aquatic
MG-Rast	4441607.3	Aquatic
MG-Rast	4441609.3	Aquatic
MG-Rast	4441610.3	Aquatic
MG-Rast	4441611.3	Aquatic
MG-Rast	4441613.3	Aquatic
MG-Rast	4441614.3	Aquatic
MG-Rast	4441615.3	Aquatic
MG-Rast	4441616.3	Aquatic
MG-Rast	4441617.3	Aquatic
MG-Rast	4441618.3	Aquatic
MG-Rast	4441619.3	Fossil
MG-Rast	4441620.3	Fossil
MG-Rast	4441656.4	Fossil
MG-Rast	4441658.3	Aquatic
MG-Rast	4441659.3	Aquatic
MG-Rast	4441660.3	Aquatic
MG-Rast	4441661.3	Aquatic
MG-Rast	4441662.3	Aquatic
MG-Rast	4441679.3	Host-associated
MG-Rast	4441680.3	Host-associated
MG-Rast	4441681.3	Host-associated
MG-Rast	4441682.3	Host-associated
MG-Rast	4442466.3	Virus-enriched
MG-Rast	4442467.3	Aquatic
MG-Rast	4442472.3	Virus-enriched
MG-Rast	4442701.3	Host-associated
MG-Rast	4443231.3	Terrestrial
MG-Rast	4443232.3	Virus-enriched
MG-Rast	4443316.3	Virus-enriched
MG-Rast	4443679.3	Aquatic
MG-Rast	4443680.3	Aquatic
MG-Rast	4443681.3	Aquatic
MG-Rast	4443682.3	Virus-enriched
MG-Rast	4443683.3	Virus-enriched
MG-Rast	4443684.3	Virus-enriched
MG-Rast	4443685.3	Virus-enriched
MG-Rast	4443686.3	Aquatic
MG-Rast	4443687.3	Aquatic
MG-Rast	4443688.3	Aquatic
MG-Rast	4443689.3	Aquatic
MG-Rast	4443691.3	Aquatic
MG-Rast	4443693.3	Aquatic
MG-Rast	4443695.3	Aquatic
MG-Rast	4443697.3	Aquatic
MG-Rast	4443698.3	Aquatic
MG-Rast	4443699.3	Aquatic
MG-Rast	4443700.3	Aquatic
MG-Rast	4443701.3	Aquatic
MG-Rast	4443708.3	Virus-enriched
MG-Rast	4443711.3	Aquatic
MG-Rast	4443712.3	Aquatic
MG-Rast	4443713.3	Aquatic
MG-Rast	4443714.3	Aquatic
MG-Rast	4443715.3	Aquatic
MG-Rast	4443716.3	Aquatic
MG-Rast	4443717.3	Aquatic
MG-Rast	4443718.3	Aquatic
MG-Rast	4443719.3	Aquatic
MG-Rast	4443720.3	Aquatic
MG-Rast	4443722.3	Aquatic
MG-Rast	4443723.3	Aquatic
MG-Rast	4443725.3	Aquatic
MG-Rast	4443729.3	Aquatic
MG-Rast	4443731.3	Aquatic
MG-Rast	4443732.3	Aquatic
MG-Rast	4443733.3	Aquatic
MG-Rast	4443734.3	Aquatic
MG-Rast	4443749.3	Extreme
MG-Rast	4443753.3	Virus-enriched
MG-Rast	4443754.3	Virus-enriched
MG-Rast	4443755.3	Virus-enriched
MG-Rast	4443756.3	Virus-enriched
MG-Rast	4443762.3	Extreme
MG-Rast	4443766.3	Aquatic
MG-Rast	4444164.3	Host-associated
MG-Rast	4444165.3	Host-associated
MG-Rast	4444195.3	Virus-enriched
MG-Rast	4444196.3	Host-associated
MG-Rast	4444702.3	Host-associated
MG-Rast	4444703.3	Host-associated
MG-Rast	4445064.3	Aquatic
MG-Rast	4445728.3	Virus-enriched
MG-Rast	4445730.3	Virus-enriched
MG-Rast	4445731.3	Virus-enriched
MG-Rast	4445990.3	Terrestrial
MG-Rast	4445993.3	Terrestrial
MG-Rast	4446075.3	Virus-enriched
MG-Rast	4446120.3	Virus-enriched
MG-Rast	4446121.3	Virus-enriched
MG-Rast	4446125.3	Host-associated
MG-Rast	4446126.3	Host-associated
MG-Rast	4446341.3	Aquatic
MG-Rast	4446342.3	Aquatic
MG-Rast	4446406.3	Aquatic
MG-Rast	4446411.3	Aquatic
MG-Rast	4446412.3	Aquatic
MG-Rast	4447101.3	Oral
MG-Rast	4447102.3	Oral
MG-Rast	4447103.3	Oral
MG-Rast	4447192.3	Oral
MG-Rast	4447903.3	Oral
MG-Rast	4447943.3	Host-associated
MG-Rast	4447970.3	Oral
MG-Rast	4447971.3	Oral
MG-Rast	4448187.3	Extreme
MG-Rast	4448367.3	Host-associated
MG-Rast	4449104.3	Aquatic
MG-Rast	4449125.3	Terrestrial
MG-Rast	4449126.3	Terrestrial
MG-Rast	4449206.3	Virus-enriched
MG-Rast	4449590.3	Aquatic
MG-Rast	4449591.3	Aquatic
MG-Rast	4450213.3	Food
MG-Rast	4450218.3	Food
MG-Rast	4450678.3	Virus-enriched
MG-Rast	4450679.3	Virus-enriched
MG-Rast	4450680.3	Virus-enriched
MG-Rast	4450729.3	Terrestrial
MG-Rast	4450731.3	Terrestrial
MG-Rast	4450750.3	Terrestrial
MG-Rast	4450752.3	Terrestrial
MG-Rast	4451103.3	Terrestrial
MG-Rast	4451105.3	Terrestrial
MG-Rast	4451106.3	Terrestrial
MG-Rast	4453064.3	Virus-enriched
MG-Rast	4453083.3	Aquatic
MG-Rast	4453374.3	Virus-enriched
MG-Rast	4454379.3	Host-associated
MG-Rast	4454380.3	Host-associated
MG-Rast	4454959.3	Food
MG-Rast	4454960.3	Food
MG-Rast	4455295.3	Aquatic
MG-Rast	4459941.3	Aquatic
MG-Rast	4461121.3	Feces/GI tract
MG-Rast	4461122.3	Feces/GI tract
MG-Rast	4461123.3	Feces/GI tract
MG-Rast	4461124.3	Feces/GI tract
MG-Rast	4461125.3	Feces/GI tract
MG-Rast	4461126.3	Feces/GI tract
MG-Rast	4461127.3	Feces/GI tract
MG-Rast	4461128.3	Feces/GI tract
MG-Rast	4461129.3	Feces/GI tract
MG-Rast	4461130.3	Feces/GI tract
MG-Rast	4461131.3	Feces/GI tract
MG-Rast	4461132.3	Feces/GI tract
MG-Rast	4461133.3	Feces/GI tract
MG-Rast	4461134.3	Feces/GI tract
MG-Rast	4461135.3	Feces/GI tract
MG-Rast	4461136.3	Feces/GI tract
MG-Rast	4461137.3	Feces/GI tract
MG-Rast	4461138.3	Feces/GI tract
MG-Rast	4461139.3	Feces/GI tract
MG-Rast	4461140.3	Feces/GI tract
MG-Rast	4461141.3	Feces/GI tract
MG-Rast	4461142.3	Feces/GI tract
MG-Rast	4461143.3	Feces/GI tract
MG-Rast	4461144.3	Feces/GI tract
MG-Rast	4461145.3	Feces/GI tract
MG-Rast	4461146.3	Feces/GI tract
MG-Rast	4461147.3	Feces/GI tract
MG-Rast	4461148.3	Feces/GI tract
MG-Rast	4461149.3	Feces/GI tract
MG-Rast	4461150.3	Feces/GI tract
MG-Rast	4461151.3	Feces/GI tract
MG-Rast	4461152.3	Feces/GI tract
MG-Rast	4461153.3	Feces/GI tract
MG-Rast	4461154.3	Feces/GI tract
MG-Rast	4461155.3	Feces/GI tract
MG-Rast	4461156.3	Feces/GI tract
MG-Rast	4461157.3	Feces/GI tract
MG-Rast	4461159.3	Feces/GI tract
MG-Rast	4461160.3	Feces/GI tract
MG-Rast	4461161.3	Feces/GI tract
MG-Rast	4461162.3	Feces/GI tract
MG-Rast	4461163.3	Feces/GI tract
MG-Rast	4461164.3	Feces/GI tract
MG-Rast	4461165.3	Feces/GI tract
MG-Rast	4461166.3	Feces/GI tract
MG-Rast	4461167.3	Feces/GI tract
MG-Rast	4461168.3	Feces/GI tract
MG-Rast	4461169.3	Feces/GI tract
MG-Rast	4461170.3	Feces/GI tract
MG-Rast	4461171.3	Feces/GI tract
MG-Rast	4461172.3	Feces/GI tract
MG-Rast	4461173.3	Feces/GI tract
MG-Rast	4461174.3	Feces/GI tract
MG-Rast	4461175.3	Feces/GI tract
MG-Rast	4461176.3	Feces/GI tract
MG-Rast	4461177.3	Feces/GI tract
MG-Rast	4461178.3	Feces/GI tract
MG-Rast	4461179.3	Feces/GI tract
MG-Rast	4461180.3	Feces/GI tract
MG-Rast	4461181.3	Feces/GI tract
MG-Rast	4461182.3	Feces/GI tract
MG-Rast	4461183.3	Feces/GI tract
MG-Rast	4461184.3	Feces/GI tract
MG-Rast	4461185.3	Feces/GI tract
MG-Rast	4461186.3	Feces/GI tract
MG-Rast	4461187.3	Feces/GI tract
MG-Rast	4461188.3	Feces/GI tract
MG-Rast	4461189.3	Feces/GI tract
MG-Rast	4461190.3	Feces/GI tract
MG-Rast	4461191.3	Feces/GI tract
MG-Rast	4461192.3	Feces/GI tract
MG-Rast	4461193.3	Feces/GI tract
MG-Rast	4461194.3	Feces/GI tract
MG-Rast	4461195.3	Feces/GI tract
MG-Rast	4461196.3	Feces/GI tract
MG-Rast	4461197.3	Feces/GI tract
MG-Rast	4461198.3	Feces/GI tract
MG-Rast	4461199.3	Feces/GI tract
MG-Rast	4461200.3	Feces/GI tract
MG-Rast	4461201.3	Feces/GI tract
MG-Rast	4461202.3	Feces/GI tract
MG-Rast	4461203.3	Feces/GI tract
MG-Rast	4461204.3	Feces/GI tract
MG-Rast	4461205.3	Feces/GI tract
MG-Rast	4461206.3	Feces/GI tract
MG-Rast	4461207.3	Feces/GI tract
MG-Rast	4461208.3	Feces/GI tract
MG-Rast	4461209.3	Feces/GI tract
MG-Rast	4461210.3	Feces/GI tract
MG-Rast	4461211.3	Feces/GI tract
MG-Rast	4461212.3	Feces/GI tract
MG-Rast	4461214.3	Feces/GI tract
MG-Rast	4461215.3	Feces/GI tract
MG-Rast	4461216.3	Feces/GI tract
MG-Rast	4461217.3	Feces/GI tract
MG-Rast	4461218.3	Feces/GI tract
MG-Rast	4461219.3	Feces/GI tract
MG-Rast	4461220.3	Feces/GI tract
MG-Rast	4461221.3	Feces/GI tract
MG-Rast	4461222.3	Feces/GI tract
MG-Rast	4461224.3	Feces/GI tract
MG-Rast	4461225.3	Feces/GI tract
MG-Rast	4461226.3	Feces/GI tract
MG-Rast	4461227.3	Feces/GI tract
MG-Rast	4461228.3	Feces/GI tract
MG-Rast	4461229.3	Feces/GI tract
MG-Rast	4461284.3	Feces/GI tract
MG-Rast	4461285.3	Feces/GI tract
MG-Rast	4461286.3	Feces/GI tract
MG-Rast	4461287.3	Feces/GI tract
MG-Rast	4461288.3	Feces/GI tract
MG-Rast	4461289.3	Feces/GI tract
MG-Rast	4461290.3	Feces/GI tract
MG-Rast	4461291.3	Feces/GI tract
MG-Rast	4461292.3	Feces/GI tract
MG-Rast	4461293.3	Feces/GI tract
MG-Rast	4461294.3	Feces/GI tract
MG-Rast	4461295.3	Feces/GI tract
MG-Rast	4461296.3	Feces/GI tract
MG-Rast	4461297.3	Feces/GI tract
MG-Rast	4461298.3	Feces/GI tract
MG-Rast	4461299.3	Feces/GI tract
MG-Rast	4461300.3	Feces/GI tract
MG-Rast	4461301.3	Feces/GI tract
MG-Rast	4461341.3	Feces/GI tract
MG-Rast	4461342.3	Feces/GI tract
MG-Rast	4461343.3	Feces/GI tract
MG-Rast	4461344.3	Feces/GI tract
MG-Rast	4461345.3	Feces/GI tract
MG-Rast	4461346.3	Feces/GI tract
MG-Rast	4461347.3	Feces/GI tract
MG-Rast	4461348.3	Feces/GI tract
MG-Rast	4461349.3	Feces/GI tract
MG-Rast	4461350.3	Feces/GI tract
MG-Rast	4461351.3	Feces/GI tract
MG-Rast	4461352.3	Feces/GI tract
MG-Rast	4461353.3	Feces/GI tract
MG-Rast	4461354.3	Feces/GI tract
MG-Rast	4461355.3	Feces/GI tract
MG-Rast	4461356.3	Feces/GI tract
MG-Rast	4461357.3	Feces/GI tract
MG-Rast	4461358.3	Feces/GI tract
MG-Rast	4461360.3	Feces/GI tract
MG-Rast	4461361.3	Feces/GI tract
MG-Rast	4461362.3	Feces/GI tract
MG-Rast	4461363.3	Feces/GI tract
MG-Rast	4461364.3	Feces/GI tract
MG-Rast	4461367.3	Feces/GI tract
MG-Rast	4461368.3	Feces/GI tract
MG-Rast	4461369.3	Feces/GI tract
MG-Rast	4461370.3	Feces/GI tract
MG-Rast	4461371.3	Feces/GI tract
MG-Rast	4461372.3	Feces/GI tract
MG-Rast	4461374.3	Feces/GI tract
MG-Rast	4461375.3	Feces/GI tract
MG-Rast	4461376.3	Feces/GI tract
MG-Rast	4461377.3	Feces/GI tract
MG-Rast	4461378.3	Feces/GI tract
MG-Rast	4461379.3	Feces/GI tract
MG-Rast	4461380.3	Feces/GI tract
MG-Rast	4461383.3	Feces/GI tract
MG-Rast	4461444.3	Aquatic
MG-Rast	4461451.3	Aquatic
MG-Rast	4461453.3	Aquatic
MG-Rast	4461455.3	Aquatic
MG-Rast	4461619.3	Extreme
MG-Rast	4463936.3	Aquatic
MG-Rast	4467029.3	Aquatic
MG-Rast	4467058.3	Aquatic
MG-Rast	4467059.3	Aquatic
MG-Rast	4470602.3	Extreme
MG-Rast	4474251.3	Host-associated
MG-Rast	4474351.3	Feces/GI tract
MG-Rast	4474352.3	Feces/GI tract
MG-Rast	4474355.3	Feces/GI tract
MG-Rast	4474357.3	Feces/GI tract
MG-Rast	4474358.3	Terrestrial
MG-Rast	4474359.3	Terrestrial
MG-Rast	4474360.3	Feces/GI tract
MG-Rast	4474361.3	Feces/GI tract
MG-Rast	4474369.3	Feces/GI tract
MG-Rast	4477729.3	Aquatic
MG-Rast	4477824.3	Virus-enriched
MG-Rast	4478241.3	Extreme
MG-Rast	4478242.3	Aquatic
MG-Rast	4487523.3	Host-associated
HMP	4489328	Food
HMP	4489650	Terrestrial
HMP	4489663	Feces/GI tract
HMP	4489668	Terrestrial
HMP	4491686	Host-associated
HMP	4492964	Feces/GI tract
HMP	4492976	Terrestrial
HMP	4503511	Aquatic
HMP	SRS011061	Feces/GI tract
HMP	SRS011086	Oral
HMP	SRS011090	Oral
HMP	SRS011098	Oral
HMP	SRS011105	Airways
HMP	SRS011111	UG tract
HMP	SRS011132	Airways
HMP	SRS011134	Feces/GI tract
HMP	SRS011144	Oral
HMP	SRS011239	Feces/GI tract
HMP	SRS011243	Oral
HMP	SRS011247	Oral
HMP	SRS011255	Oral
HMP	SRS011263	Airways
HMP	SRS011269	UG tract
HMP	SRS011271	Feces/GI tract
HMP	SRS011302	Feces/GI tract
HMP	SRS011310	Oral
HMP	SRS011343	Oral
HMP	SRS011355	UG tract
HMP	SRS011397	Airways
HMP	SRS011405	Feces/GI tract
HMP	SRS011452	Feces/GI tract
HMP	SRS011529	Feces/GI tract
HMP	SRS011584	UG tract
HMP	SRS011586	Feces/GI tract
HMP	SRS012273	Feces/GI tract
HMP	SRS012279	Oral
HMP	SRS012281	Oral
HMP	SRS012285	Oral
HMP	SRS012291	Airways
HMP	SRS012663	Airways
HMP	SRS013155	Airways
HMP	SRS013158	Feces/GI tract
HMP	SRS013164	Oral
HMP	SRS013215	Feces/GI tract
HMP	SRS013239	Oral
HMP	SRS013252	Oral
HMP	SRS013269	Airways
HMP	SRS013476	Feces/GI tract
HMP	SRS013506	Oral
HMP	SRS013521	Feces/GI tract
HMP	SRS013542	UG tract
HMP	SRS013637	Airways
HMP	SRS013687	Feces/GI tract
HMP	SRS013705	Oral
HMP	SRS013711	Oral
HMP	SRS013836	Oral
HMP	SRS013876	Airways
HMP	SRS013881	Oral
HMP	SRS013942	Oral
HMP	SRS013945	Oral
HMP	SRS013947	Oral
HMP	SRS013948	Oral
HMP	SRS013950	Oral
HMP	SRS013951	Feces/GI tract
HMP	SRS013956	Airways
HMP	SRS014107	Oral
HMP	SRS014126	Oral
HMP	SRS014235	Feces/GI tract
HMP	SRS014287	Feces/GI tract
HMP	SRS014313	Feces/GI tract
HMP	SRS014343	UG tract
HMP	SRS014464	Airways
HMP	SRS014466	UG tract
HMP	SRS014468	Oral
HMP	SRS014472	Oral
HMP	SRS014473	Oral
HMP	SRS014474	Oral
HMP	SRS014475	Oral
HMP	SRS014477	Oral
HMP	SRS014494	UG tract
HMP	SRS014575	Oral
HMP	SRS014578	Oral
HMP	SRS014682	Airways
HMP	SRS014683	Feces/GI tract
HMP	SRS014684	Oral
HMP	SRS014686	Oral
HMP	SRS014687	Oral
HMP	SRS014690	Oral
HMP	SRS014691	Oral
HMP	SRS014692	Oral
HMP	SRS014888	Oral
HMP	SRS014890	Oral
HMP	SRS014894	Oral
HMP	SRS014901	Airways
HMP	SRS014923	Feces/GI tract
HMP	SRS014979	Feces/GI tract
HMP	SRS015040	Oral
HMP	SRS015044	Oral
HMP	SRS015051	Airways
HMP	SRS015054	UG tract
HMP	SRS015055	Oral
HMP	SRS015059	Oral
HMP	SRS015061	Oral
HMP	SRS015062	Oral
HMP	SRS015063	Oral
HMP	SRS015071	UG tract
HMP	SRS015072	UG tract
HMP	SRS015073	UG tract
HMP	SRS015133	Feces/GI tract
HMP	SRS015158	Oral
HMP	SRS015168	UG tract
HMP	SRS015215	Oral
HMP	SRS015217	Feces/GI tract
HMP	SRS015225	UG tract
HMP	SRS015264	Feces/GI tract
HMP	SRS015269	Airways
HMP	SRS015272	Oral
HMP	SRS015274	Oral
HMP	SRS015369	Feces/GI tract
HMP	SRS015374	Oral
HMP	SRS015378	Oral
HMP	SRS015381	Skin
HMP	SRS015395	Oral
HMP	SRS015425	UG tract
HMP	SRS015430	Airways
HMP	SRS015440	Oral
HMP	SRS015450	Airways
HMP	SRS015540	Oral
HMP	SRS015574	Oral
HMP	SRS015578	Feces/GI tract
HMP	SRS015640	Airways
HMP	SRS015646	Oral
HMP	SRS015650	Oral
HMP	SRS015663	Feces/GI tract
HMP	SRS015745	Oral
HMP	SRS015752	Airways
HMP	SRS015755	Oral
HMP	SRS015782	Feces/GI tract
HMP	SRS015793	Airways
HMP	SRS015794	Feces/GI tract
HMP	SRS015797	Oral
HMP	SRS015799	Oral
HMP	SRS015803	Oral
HMP	SRS015893	Oral
HMP	SRS015895	Oral
HMP	SRS015899	Oral
HMP	SRS015937	Airways
HMP	SRS015947	Oral
HMP	SRS015985	Oral
HMP	SRS015989	Oral
HMP	SRS015996	Airways
HMP	SRS016002	Oral
HMP	SRS016018	Feces/GI tract
HMP	SRS016033	Airways
HMP	SRS016056	Feces/GI tract
HMP	SRS016086	Oral
HMP	SRS016088	Oral
HMP	SRS016092	Oral
HMP	SRS016095	Feces/GI tract
HMP	SRS016111	UG tract
HMP	SRS016188	Airways
HMP	SRS016191	UG tract
HMP	SRS016196	Oral
HMP	SRS016225	Oral
HMP	SRS016267	Feces/GI tract
HMP	SRS016292	Airways
HMP	SRS016297	Oral
HMP	SRS016319	Oral
HMP	SRS016331	Oral
HMP	SRS016335	Feces/GI tract
HMP	SRS016342	Oral
HMP	SRS016349	Oral
HMP	SRS016360	Oral
HMP	SRS016434	Airways
HMP	SRS016495	Feces/GI tract
HMP	SRS016501	Oral
HMP	SRS016503	Oral
HMP	SRS016513	Airways
HMP	SRS016541	Oral
HMP	SRS016553	Airways
HMP	SRS016581	Airways
HMP	SRS016584	UG tract
HMP	SRS016585	Feces/GI tract
HMP	SRS016600	Oral
HMP	SRS016752	Airways
HMP	SRS016944	Skin
HMP	SRS017007	Oral
HMP	SRS017025	Oral
HMP	SRS017044	Airways
HMP	SRS017076	Oral
HMP	SRS017080	Oral
HMP	SRS017088	Oral
HMP	SRS017127	Oral
HMP	SRS017156	Airways
HMP	SRS017191	Feces/GI tract
HMP	SRS017209	Oral
HMP	SRS017215	Oral
HMP	SRS017244	Airways
HMP	SRS017304	Oral
HMP	SRS017307	Feces/GI tract
HMP	SRS017441	Oral
HMP	SRS017445	Oral
HMP	SRS017451	Airways
HMP	SRS017497	UG tract
HMP	SRS017520	UG tract
HMP	SRS017521	Feces/GI tract
HMP	SRS017533	Oral
HMP	SRS017537	Oral
HMP	SRS017697	Airways
HMP	SRS017700	UG tract
HMP	SRS017713	Oral
HMP	SRS017810	Oral
HMP	SRS017814	Oral
HMP	SRS017820	Airways
HMP	SRS017849	Skin
HMP	SRS017851	Skin
HMP	SRS018133	Feces/GI tract
HMP	SRS018149	Oral
HMP	SRS018312	Airways
HMP	SRS018313	Feces/GI tract
HMP	SRS018329	Oral
HMP	SRS018337	Oral
HMP	SRS018351	Feces/GI tract
HMP	SRS018357	Oral
HMP	SRS018369	Airways
HMP	SRS018427	Feces/GI tract
HMP	SRS018439	Oral
HMP	SRS018443	Oral
HMP	SRS018463	Airways
HMP	SRS018569	Oral
HMP	SRS018585	Airways
HMP	SRS018656	Feces/GI tract
HMP	SRS018661	Oral
HMP	SRS018671	Airways
HMP	SRS018739	Oral
HMP	SRS018769	UG tract
HMP	SRS018774	Oral
HMP	SRS018778	Oral
HMP	SRS018784	Airways
HMP	SRS018791	Oral
HMP	SRS018969	Oral
HMP	SRS018971	Oral
HMP	SRS018975	Oral
HMP	SRS018978	Skin
HMP	SRS018981	Airways
HMP	SRS019015	Skin
HMP	SRS019016	Skin
HMP	SRS019019	Airways
HMP	SRS019022	Oral
HMP	SRS019024	Oral
HMP	SRS019025	Oral
HMP	SRS019026	Oral
HMP	SRS019027	Oral
HMP	SRS019028	Oral
HMP	SRS019029	Oral
HMP	SRS019033	Skin
HMP	SRS019039	Airways
HMP	SRS019063	Skin
HMP	SRS019067	Airways
HMP	SRS019071	Oral
HMP	SRS019073	Oral
HMP	SRS019077	Oral
HMP	SRS019081	Skin
HMP	SRS019087	Airways
HMP	SRS019116	Skin
HMP	SRS019119	Airways
HMP	SRS019120	Oral
HMP	SRS019122	Oral
HMP	SRS019124	Oral
HMP	SRS019125	Oral
HMP	SRS019127	Oral
HMP	SRS019129	Oral
HMP	SRS019215	Airways
HMP	SRS019221	Oral
HMP	SRS019225	Oral
HMP	SRS019267	Feces/GI tract
HMP	SRS019329	Oral
HMP	SRS019333	Oral
HMP	SRS019339	Airways
HMP	SRS019379	UG tract
HMP	SRS019386	Airways
HMP	SRS019387	Oral
HMP	SRS019389	Oral
HMP	SRS019391	Oral
HMP	SRS019397	Feces/GI tract
HMP	SRS019582	Feces/GI tract
HMP	SRS019587	Oral
HMP	SRS019591	Oral
HMP	SRS019597	Airways
HMP	SRS019600	UG tract
HMP	SRS019601	Feces/GI tract
HMP	SRS019685	Feces/GI tract
HMP	SRS019867	Airways
HMP	SRS019872	Oral
HMP	SRS019906	Oral
HMP	SRS019910	Feces/GI tract
HMP	SRS019986	Airways
HMP	SRS019989	UG tract
HMP	SRS020222	Oral
HMP	SRS020232	Airways
HMP	SRS020263	Skin
HMP	SRS020328	Feces/GI tract
HMP	SRS020336	Oral
HMP	SRS020340	Oral
HMP	SRS020349	UG tract
HMP	SRS020386	Airways
HMP	SRS020856	Oral
HMP	SRS020862	Oral
HMP	SRS020868	Airways
HMP	SRS020869	Feces/GI tract
HMP	SRS021473	Oral
HMP	SRS021477	Oral
HMP	SRS021483	Airways
HMP	SRS021484	Feces/GI tract
HMP	SRS021948	Feces/GI tract
HMP	SRS021969	UG tract
HMP	SRS022006	Airways
HMP	SRS022071	Feces/GI tract
HMP	SRS022079	Oral
HMP	SRS022083	Oral
HMP	SRS022092	UG tract
HMP	SRS022129	Airways
HMP	SRS022145	Oral
HMP	SRS022149	Oral
HMP	SRS022158	UG tract
HMP	SRS022532	Oral
HMP	SRS022545	UG tract
HMP	SRS022609	Feces/GI tract
HMP	SRS022645	Airways
HMP	SRS022713	Feces/GI tract
HMP	SRS022719	Oral
HMP	SRS022721	Oral
HMP	SRS022734	UG tract
HMP	SRS023212	Airways
HMP	SRS023354	Oral
HMP	SRS023358	Oral
HMP	SRS023468	UG tract
HMP	SRS023526	Feces/GI tract
HMP	SRS023534	Oral
HMP	SRS023538	Oral
HMP	SRS023557	Oral
HMP	SRS023583	Feces/GI tract
HMP	SRS023591	Oral
HMP	SRS023595	Oral
HMP	SRS023604	UG tract
HMP	SRS023617	Oral
HMP	SRS023837	Oral
HMP	SRS023841	Oral
HMP	SRS023847	Airways
HMP	SRS023850	UG tract
HMP	SRS023914	Feces/GI tract
HMP	SRS023930	Oral
HMP	SRS023938	Oral
HMP	SRS023958	Oral
HMP	SRS023964	Oral
HMP	SRS023970	Airways
HMP	SRS023987	Oral
HMP	SRS024017	Oral
HMP	SRS024064	Airways
HMP	SRS024068	UG tract
HMP	SRS024087	Oral
HMP	SRS024132	Feces/GI tract
HMP	SRS024138	Oral
HMP	SRS024140	Oral
HMP	SRS024144	Oral
HMP	SRS024265	Feces/GI tract
HMP	SRS024281	Oral
HMP	SRS024289	Oral
HMP	SRS024301	Airways
HMP	SRS024318	Oral
HMP	SRS024347	Oral
HMP	SRS024355	Oral
HMP	SRS024377	Oral
HMP	SRS024381	Oral
HMP	SRS024388	Feces/GI tract
HMP	SRS024424	Airways
HMP	SRS024428	UG tract
HMP	SRS024435	Feces/GI tract
HMP	SRS024447	Oral
HMP	SRS024482	Skin
HMP	SRS024557	Oral
HMP	SRS024561	Oral
HMP	SRS024567	Airways
HMP	SRS024580	Oral
HMP	SRS024620	Skin
HMP	SRS024637	Oral
HMP	SRS024641	Oral
HMP	SRS042284	Feces/GI tract
HMP	SRS042428	UG tract
HMP	SRS042457	Oral
HMP	SRS042628	Feces/GI tract
HMP	SRS042643	Oral
HMP	SRS042858	UG tract
HMP	SRS043239	Oral
HMP	SRS043422	Oral
HMP	SRS043646	Oral
HMP	SRS043676	Oral
HMP	SRS043755	Oral
HMP	SRS043772	Oral
HMP	SRS043803	Oral
HMP	SRS044366	Oral
HMP	SRS044474	Airways
HMP	SRS044626	Airways
HMP	SRS044662	Oral
HMP	SRS044742	UG tract
HMP	SRS045049	Oral
HMP	SRS045127	Oral
HMP	SRS045197	Oral
HMP	SRS045254	Oral
HMP	SRS045262	Oral
HMP	SRS045313	Oral
HMP	SRS046344	Airways
HMP	SRS046686	Oral
HMP	SRS046973	Airways
HMP	SRS047044	Feces/GI tract
HMP	SRS047100	Oral
HMP	SRS047210	Oral
HMP	SRS047219	Oral
HMP	SRS047225	Airways
HMP	SRS047254	Airways
HMP	SRS047265	Oral
HMP	SRS047335	UG tract
HMP	SRS047634	Oral
HMP	SRS047708	Airways
HMP	SRS047824	Oral
HMP	SRS048719	Oral
HMP	SRS049237	UG tract
HMP	SRS049268	Oral
HMP	SRS049283	Oral
HMP	SRS049318	Oral
HMP	SRS049389	Oral
HMP	SRS049712	Feces/GI tract
HMP	SRS049744	Airways
HMP	SRS049900	Feces/GI tract
HMP	SRS049959	Feces/GI tract
HMP	SRS050007	Oral
HMP	SRS050025	Airways
HMP	SRS050029	Oral
HMP	SRS050184	UG tract
HMP	SRS050422	Feces/GI tract
HMP	SRS050484	Airways
HMP	SRS050669	Oral
HMP	SRS050752	Feces/GI tract
HMP	SRS051031	Feces/GI tract
HMP	SRS051116	Oral
HMP	SRS051244	Oral
HMP	SRS051378	Oral
HMP	SRS051505	UG tract
HMP	SRS051600	Airways
HMP	SRS051613	Airways
HMP	SRS051791	Oral
HMP	SRS052227	Oral
HMP	SRS052330	UG tract
HMP	SRS052590	Airways
HMP	SRS052604	Oral
HMP	SRS052620	UG tract
HMP	SRS052668	Oral
HMP	SRS052756	UG tract
HMP	SRS052876	Oral
HMP	SRS053335	Feces/GI tract
HMP	SRS053398	Feces/GI tract
HMP	SRS053437	Airways
HMP	SRS053584	Oral
HMP	SRS053630	Oral
HMP	SRS053917	Oral
HMP	SRS054061	Airways
HMP	SRS054430	Oral
HMP	SRS054569	Oral
HMP	SRS054590	Feces/GI tract
HMP	SRS054653	Oral
HMP	SRS054956	Feces/GI tract
HMP	SRS055118	Oral
HMP	SRS055298	UG tract
HMP	SRS055378	Oral
HMP	SRS055450	Oral
HMP	SRS055495	Oral
HMP	SRS056157	Oral
HMP	SRS056210	Airways
HMP	SRS056323	Oral
HMP	SRS056695	UG tract
HMP	SRS056796	UG tract
HMP	SRS056892	Oral
HMP	SRS056906	Airways
HMP	SRS057022	Oral
HMP	SRS057083	Skin
HMP	SRS057355	Oral
HMP	SRS057539	Oral
HMP	SRS057692	Oral
HMP	SRS057717	Feces/GI tract
HMP	SRS057807	UG tract
HMP	SRS058053	Oral
HMP	SRS058105	Oral
HMP	SRS058182	Skin
HMP	SRS058186	Oral
HMP	SRS058213	Airways
HMP	SRS062520	UG tract
HMP	SRS062544	Oral
HMP	SRS062713	Airways
HMP	SRS062761	Oral
HMP	SRS062878	Oral
HMP	SRS063035	Airways
HMP	SRS063040	Feces/GI tract
HMP	SRS063178	Airways
HMP	SRS063272	Oral
HMP	SRS063287	Oral
HMP	SRS063288	Oral
HMP	SRS063351	Oral
HMP	SRS063417	UG tract
HMP	SRS063603	Oral
HMP	SRS063932	Oral
HMP	SRS063985	Feces/GI tract
HMP	SRS064219	Oral
HMP	SRS064376	UG tract
HMP	SRS064449	Oral
HMP	SRS064493	Oral
HMP	SRS064704	UG tract
HMP	SRS064774	Oral
HMP	SRS064809	Oral
HMP	SRS065099	Oral
HMP	SRS065133	Oral
HMP	SRS065142	Airways
HMP	SRS065179	Airways
HMP	SRS065278	Oral
HMP	SRS065335	Oral
HMP	SRS065347	UG tract
HMP	SRS065431	Oral
HMP	SRS065504	Feces/GI tract
HMP	SRS075398	Feces/GI tract
HMP	SRS075410	Oral
HMP	SRS075419	UG tract
HMP	SRS077738	Oral
HMP	SRS077751	UG tract
HMP	SRS078176	Feces/GI tract
EMBL-EBI	ERR208318	Fossil
EMBL-EBI	ERR208319	Fossil
EMBL-EBI	ERR208320	Fossil
EMBL-EBI	ERR208321	Fossil
EMBL-EBI	ERR208322	Fossil
EMBL-EBI	ERR208323	Fossil
EMBL-EBI	ERR208324	Fossil
EMBL-EBI	ERR208325	Fossil
EMBL-EBI	ERR208326	Fossil
EMBL-EBI	ERR208327	Fossil
EMBL-EBI	ERR208328	Fossil
EMBL-EBI	ERR208329	Fossil
EMBL-EBI	ERR208330	Fossil
EMBL-EBI	ERR208331	Fossil
EMBL-EBI	ERR208332	Fossil
EMBL-EBI	ERR208333	Fossil
EMBL-EBI	ERR208334	Fossil
EMBL-EBI	ERR208335	Fossil
EMBL-EBI	ERR208336	Fossil
EMBL-EBI	ERR208337	Fossil
EMBL-EBI	ERR208338	Fossil
EMBL-EBI	ERR208339	Fossil
EMBL-EBI	ERR208340	Fossil
EMBL-EBI	ERR208341	Fossil
EMBL-EBI	ERR208342	Fossil
EMBL-EBI	ERR208343	Fossil
EMBL-EBI	ERR208344	Fossil
EMBL-EBI	ERR208345	Fossil
EMBL-EBI	ERR208346	Fossil
EMBL-EBI	ERR208347	Fossil
EMBL-EBI	ERR208348	Fossil
EMBL-EBI	ERR208349	Fossil
EMBL-EBI	ERR208350	Fossil
EMBL-EBI	ERR208351	Fossil
EMBL-EBI	ERR208352	Fossil
EMBL-EBI	ERR208353	Fossil
EMBL-EBI	ERR208354	Fossil
EMBL-EBI	ERR208355	Fossil
EMBL-EBI	ERR208356	Fossil
EMBL-EBI	ERR208357	Fossil
EMBL-EBI	ERR208358	Fossil
EMBL-EBI	ERR208359	Fossil
EMBL-EBI	ERR208360	Fossil
EMBL-EBI	ERR208361	Fossil
EMBL-EBI	ERR208362	Fossil
EMBL-EBI	ERR208363	Fossil
EMBL-EBI	ERR208364	Fossil
EMBL-EBI	ERR208365	Fossil
EMBL-EBI	ERR208366	Fossil
EMBL-EBI	ERR208367	Fossil
EMBL-EBI	ERR208368	Fossil
EMBL-EBI	ERR208369	Fossil
EMBL-EBI	ERR208370	Fossil
EMBL-EBI	ERR208371	Fossil
EMBL-EBI	ERR208372	Fossil
EMBL-EBI	ERR208373	Fossil
EMBL-EBI	ERR208374	Fossil
EMBL-EBI	ERR208375	Fossil
EMBL-EBI	ERR208376	Fossil
EMBL-EBI	ERR208377	Fossil
EMBL-EBI	ERR208378	Fossil
EMBL-EBI	ERR208379	Fossil
EMBL-EBI	ERR208380	Fossil
EMBL-EBI	ERR208381	Fossil
EMBL-EBI	ERR208382	Fossil
EMBL-EBI	ERR208383	Fossil
EMBL-EBI	ERR208384	Fossil
EMBL-EBI	ERR208385	Fossil
EMBL-EBI	ERR208386	Fossil
EMBL-EBI	ERR208387	Fossil
EMBL-EBI	ERR208388	Fossil
EMBL-EBI	ERR208389	Fossil
EMBL-EBI	ERR208390	Fossil
EMBL-EBI	ERR208391	Fossil
EMBL-EBI	ERR208392	Fossil
EMBL-EBI	ERR208393	Fossil
EMBL-EBI	ERR208394	Fossil
EMBL-EBI	ERR208395	Fossil
EMBL-EBI	ERR208396	Fossil
EMBL-EBI	ERR208397	Fossil
EMBL-EBI	ERR208398	Fossil
EMBL-EBI	ERR208399	Fossil
EMBL-EBI	ERR208400	Fossil
EMBL-EBI	ERR208401	Fossil
EMBL-EBI	ERR208402	Fossil
EMBL-EBI	ERR208403	Fossil
EMBL-EBI	ERR208404	Fossil
EMBL-EBI	ERR208405	Fossil
EMBL-EBI	ERR208406	Fossil
EMBL-EBI	ERR208407	Fossil
EMBL-EBI	ERR208408	Fossil
EMBL-EBI	ERR208409	Fossil
EMBL-EBI	ERR208410	Fossil
EMBL-EBI	ERR208411	Fossil
EMBL-EBI	ERR208412	Fossil
EMBL-EBI	ERR208413	Fossil
EMBL-EBI	ERR208414	Fossil
EMBL-EBI	ERR208415	Fossil
EMBL-EBI	ERR208416	Fossil
EMBL-EBI	ERR208417	Fossil
EMBL-EBI	ERR208418	Fossil
EMBL-EBI	ERR208419	Fossil
EMBL-EBI	ERR208420	Fossil
EMBL-EBI	ERR208421	Fossil
EMBL-EBI	ERR208422	Fossil
EMBL-EBI	ERR208423	Fossil
EMBL-EBI	ERR208424	Fossil
EMBL-EBI	ERR208425	Fossil
EMBL-EBI	ERR208426	Fossil
EMBL-EBI	ERR208427	Fossil
EMBL-EBI	ERR208428	Fossil
EMBL-EBI	ERR208429	Fossil
EMBL-EBI	ERR208430	Fossil
EMBL-EBI	ERR208431	Fossil
EMBL-EBI	ERR208432	Fossil
EMBL-EBI	ERR208433	Fossil
EMBL-EBI	ERR208434	Fossil
EMBL-EBI	ERR208435	Fossil
EMBL-EBI	ERR208436	Fossil
EMBL-EBI	ERR208437	Fossil
EMBL-EBI	ERR208438	Fossil
EMBL-EBI	ERR208439	Fossil
EMBL-EBI	ERR208440	Fossil
EMBL-EBI	ERR208441	Fossil
EMBL-EBI	ERR208442	Fossil
EMBL-EBI	ERR208443	Fossil
EMBL-EBI	ERR208444	Fossil
EMBL-EBI	ERR208445	Fossil
EMBL-EBI	ERR208446	Fossil
EMBL-EBI	ERR208447	Fossil
EMBL-EBI	ERR208448	Fossil
EMBL-EBI	ERR208449	Fossil
EMBL-EBI	ERR208450	Fossil
EMBL-EBI	ERR208451	Fossil
EMBL-EBI	ERR208452	Fossil
EMBL-EBI	ERR208453	Fossil
EMBL-EBI	ERR208454	Fossil
EMBL-EBI	ERR208455	Fossil
EMBL-EBI	ERR208456	Fossil
EMBL-EBI	ERR208457	Fossil
EMBL-EBI	ERR208458	Fossil
EMBL-EBI	ERR208459	Fossil
EMBL-EBI	ERR208460	Fossil
EMBL-EBI	ERR208461	Fossil
EMBL-EBI	ERR208462	Fossil
EMBL-EBI	ERR208463	Fossil
EMBL-EBI	ERR208464	Fossil
EMBL-EBI	ERR208465	Fossil
EMBL-EBI	ERR208466	Fossil
EMBL-EBI	ERR208467	Fossil
EMBL-EBI	ERR208468	Fossil
EMBL-EBI	ERR208469	Fossil
EMBL-EBI	ERR208470	Fossil
EMBL-EBI	ERR208471	Fossil
EMBL-EBI	ERR208472	Fossil
EMBL-EBI	ERR208473	Fossil
EMBL-EBI	ERR208474	Fossil
EMBL-EBI	ERR208475	Fossil
EMBL-EBI	ERR208476	Fossil
EMBL-EBI	ERR208477	Fossil
EMBL-EBI	ERR208478	Fossil
EMBL-EBI	ERR208479	Fossil
EMBL-EBI	ERR208480	Fossil
EMBL-EBI	ERR208481	Fossil
EMBL-EBI	ERR208482	Fossil
EMBL-EBI	ERR208483	Fossil
EMBL-EBI	ERR208484	Fossil
EMBL-EBI	ERR208485	Fossil
EMBL-EBI	ERR208486	Fossil
EMBL-EBI	ERR208487	Fossil
EMBL-EBI	ERR208488	Fossil
EMBL-EBI	ERR208489	Fossil
EMBL-EBI	ERR208490	Fossil
EMBL-EBI	ERR208491	Fossil
EMBL-EBI	ERR208492	Fossil
EMBL-EBI	ERR208493	Fossil
EMBL-EBI	ERR208494	Fossil
EMBL-EBI	ERR208495	Fossil
EMBL-EBI	ERR208496	Fossil
EMBL-EBI	ERR208497	Fossil
EMBL-EBI	ERR208498	Fossil
EMBL-EBI	ERR208499	Fossil
EMBL-EBI	ERR208500	Fossil
EMBL-EBI	ERR208501	Fossil
EMBL-EBI	ERR208502	Fossil
EMBL-EBI	ERR208503	Fossil
EMBL-EBI	ERR208504	Fossil
EMBL-EBI	ERR208505	Fossil
EMBL-EBI	ERR208506	Fossil
EMBL-EBI	ERR208507	Fossil
EMBL-EBI	ERR208508	Fossil
EMBL-EBI	ERR208509	Fossil
EMBL-EBI	ERR208510	Fossil
EMBL-EBI	ERR208511	Fossil
EMBL-EBI	ERR208512	Fossil
EMBL-EBI	ERR208513	Fossil
EMBL-EBI	ERR208514	Fossil
EMBL-EBI	ERR208515	Fossil
EMBL-EBI	ERR208516	Fossil
EMBL-EBI	ERR208517	Fossil
EMBL-EBI	ERR208518	Fossil
EMBL-EBI	ERR208519	Fossil
EMBL-EBI	ERR208520	Fossil
EMBL-EBI	ERR208521	Fossil
EMBL-EBI	ERR208522	Fossil
EMBL-EBI	ERR208523	Fossil
EMBL-EBI	ERR208524	Fossil
EMBL-EBI	ERR208525	Fossil
EMBL-EBI	ERR208526	Fossil
EMBL-EBI	ERR208527	Fossil
EMBL-EBI	ERR208528	Fossil
EMBL-EBI	ERR208529	Fossil
EMBL-EBI	ERR208530	Fossil
EMBL-EBI	ERR208531	Fossil
EMBL-EBI	ERR208532	Fossil
EMBL-EBI	ERR208533	Fossil
EMBL-EBI	ERR208534	Fossil
EMBL-EBI	ERR208535	Fossil
EMBL-EBI	ERR208536	Fossil
EMBL-EBI	ERR208537	Fossil
EMBL-EBI	ERR208538	Fossil
EMBL-EBI	ERR208539	Fossil
EMBL-EBI	ERR208540	Fossil
EMBL-EBI	ERR208541	Fossil
EMBL-EBI	ERR208542	Fossil
EMBL-EBI	ERR208543	Fossil
EMBL-EBI	ERR208544	Fossil
EMBL-EBI	ERR208545	Fossil
EMBL-EBI	ERR208546	Fossil
EMBL-EBI	ERR208547	Fossil
EMBL-EBI	ERR208548	Fossil
EMBL-EBI	ERR208549	Fossil
EMBL-EBI	ERR208550	Fossil
EMBL-EBI	ERR208551	Fossil
EMBL-EBI	ERR208552	Fossil
EMBL-EBI	ERR208553	Fossil
EMBL-EBI	ERR208554	Fossil
EMBL-EBI	ERR208555	Fossil
EMBL-EBI	ERR208556	Fossil
EMBL-EBI	ERR208557	Fossil
EMBL-EBI	ERR208558	Fossil
EMBL-EBI	ERR208559	Fossil
EMBL-EBI	ERR208560	Fossil
EMBL-EBI	ERR208561	Fossil
EMBL-EBI	ERR208562	Fossil
EMBL-EBI	ERR208563	Fossil
EMBL-EBI	ERR208564	Fossil
EMBL-EBI	ERR208565	Fossil
EMBL-EBI	ERR208566	Fossil
EMBL-EBI	ERR208567	Fossil
EMBL-EBI	ERR208568	Fossil
EMBL-EBI	ERR208569	Fossil
EMBL-EBI	ERR208570	Fossil
EMBL-EBI	ERR208571	Fossil
EMBL-EBI	ERR208572	Fossil
EMBL-EBI	ERR208573	Fossil
EMBL-EBI	ERR208574	Fossil
EMBL-EBI	ERR208575	Fossil
EMBL-EBI	ERR208576	Fossil
EMBL-EBI	ERR208577	Fossil
EMBL-EBI	ERR208578	Fossil
EMBL-EBI	ERR208579	Fossil
EMBL-EBI	ERR208580	Fossil
EMBL-EBI	ERR208581	Fossil
EMBL-EBI	ERR208582	Fossil
EMBL-EBI	ERR208583	Fossil
EMBL-EBI	ERR208584	Fossil
EMBL-EBI	ERR208585	Fossil
EMBL-EBI	ERR208586	Fossil
EMBL-EBI	ERR208587	Fossil
EMBL-EBI	ERR208588	Fossil
EMBL-EBI	ERR208589	Fossil
EMBL-EBI	ERR208590	Fossil
EMBL-EBI	ERR208591	Fossil
EMBL-EBI	ERR208592	Fossil
EMBL-EBI	ERR208593	Fossil
EMBL-EBI	ERR208594	Fossil
EMBL-EBI	ERR208595	Fossil
EMBL-EBI	ERR208596	Fossil
EMBL-EBI	ERR208597	Fossil
EMBL-EBI	ERR208598	Fossil
EMBL-EBI	ERR208599	Fossil
EMBL-EBI	ERS015568	Virus-enriched
EMBL-EBI	ERS075404	Host-associated
EMBL-EBI	ERS075405	Host-associated
EMBL-EBI	ERS075406	Host-associated
EMBL-EBI	ERS075407	Host-associated
EMBL-EBI	ERS075408	Host-associated
EMBL-EBI	ERS075409	Host-associated
EMBL-EBI	ERS075410	Host-associated
EMBL-EBI	ERS075411	Host-associated
EMBL-EBI	ERS075412	Host-associated
EMBL-EBI	ERS075413	Host-associated
EMBL-EBI	ERS075414	Host-associated
EMBL-EBI	ERS075415	Host-associated
EMBL-EBI	ERS078132	Terrestrial
EMBL-EBI	ERS078133	Terrestrial
EMBL-EBI	ERS078134	Terrestrial
EMBL-EBI	ERS078135	Terrestrial
EMBL-EBI	ERS078136	Terrestrial
EMBL-EBI	ERS078137	Terrestrial
EMBL-EBI	ERS078138	Terrestrial
EMBL-EBI	ERS078139	Terrestrial
EMBL-EBI	ERS089005	Aquatic
EMBL-EBI	ERS095011	Aquatic
EMBL-EBI	ERS095013	Aquatic
EMBL-EBI	ERS095014	Aquatic
EMBL-EBI	ERS095016	Aquatic
EMBL-EBI	ERS095018	Aquatic
EMBL-EBI	ERS149129	Host-associated
EMBL-EBI	ERS149130	Host-associated
EMBL-EBI	ERS149131	Host-associated
EMBL-EBI	ERS149132	Host-associated
EMBL-EBI	ERS149133	Host-associated
EMBL-EBI	ERS149134	Host-associated
EMBL-EBI	ERS149135	Host-associated
EMBL-EBI	ERS149136	Host-associated
EMBL-EBI	ERS149139	Host-associated
EMBL-EBI	ERS153818	Aquatic
EMBL-EBI	ERS153819	Aquatic
EMBL-EBI	ERS155431	Feces/GI tract
EMBL-EBI	ERS161395	Virus-enriched
EMBL-EBI	ERS161397	Host-associated
EMBL-EBI	ERS161399	Virus-enriched
EMBL-EBI	ERS161401	Virus-enriched
EMBL-EBI	ERS167137	Feces/GI tract
EMBL-EBI	ERS167139	Feces/GI tract
EMBL-EBI	ERS167146	Feces/GI tract
EMBL-EBI	ERS167147	Feces/GI tract
EMBL-EBI	ERS167148	Feces/GI tract
EMBL-EBI	ERS167149	Feces/GI tract
EMBL-EBI	ERS167150	Feces/GI tract
EMBL-EBI	ERS167152	Virus-enriched
EMBL-EBI	ERS235541	Feces/GI tract
EMBL-EBI	ERS235543	Feces/GI tract
EMBL-EBI	ERS235546	Feces/GI tract
EMBL-EBI	ERS235547	Feces/GI tract
EMBL-EBI	ERS235548	Feces/GI tract
EMBL-EBI	ERS235549	Feces/GI tract
EMBL-EBI	ERS235550	Feces/GI tract
EMBL-EBI	ERS235552	Feces/GI tract
EMBL-EBI	ERS235554	Feces/GI tract
EMBL-EBI	ERS235555	Feces/GI tract
EMBL-EBI	ERS235562	Feces/GI tract
EMBL-EBI	ERS235580	Feces/GI tract
EMBL-EBI	ERS235581	Feces/GI tract
EMBL-EBI	ERS235582	Feces/GI tract
EMBL-EBI	ERS235583	Feces/GI tract
EMBL-EBI	ERS235587	Feces/GI tract
EMBL-EBI	ERS235627	Feces/GI tract
EMBL-EBI	ERS235628	Feces/GI tract
EMBL-EBI	ERS235632	Feces/GI tract
EMBL-EBI	ERS235633	Feces/GI tract
EMBL-EBI	ERS235634	Feces/GI tract
EMBL-EBI	ERS235635	Feces/GI tract
EMBL-EBI	ERS235636	Feces/GI tract
EMBL-EBI	ERS235637	Feces/GI tract
EMBL-EBI	ERS235638	Feces/GI tract
EMBL-EBI	ERS235639	Feces/GI tract
EMBL-EBI	ERS235640	Feces/GI tract
EMBL-EBI	ERS240712	Aquatic
EMBL-EBI	ERS240713	Aquatic
EMBL-EBI	ERS240714	Aquatic
EMBL-EBI	ERS240715	Aquatic
EMBL-EBI	ERS242883	Aquatic
EMBL-EBI	ERS242884	Aquatic
EMBL-EBI	ERS351502	Terrestrial
EMBL-EBI	ERS351503	Terrestrial
EMBL-EBI	SRS000285	Aquatic
EMBL-EBI	SRS000445	Aquatic
EMBL-EBI	SRS000446	Aquatic
EMBL-EBI	SRS000447	Aquatic
EMBL-EBI	SRS000448	Aquatic
EMBL-EBI	SRS000449	Aquatic
EMBL-EBI	SRS000608	Extreme
EMBL-EBI	SRS000998	Host-associated
EMBL-EBI	SRS000999	Host-associated
EMBL-EBI	SRS001000	Host-associated
EMBL-EBI	SRS001001	Host-associated
EMBL-EBI	SRS001002	Host-associated
EMBL-EBI	SRS001003	Host-associated
EMBL-EBI	SRS001004	Host-associated
EMBL-EBI	SRS001005	Host-associated
EMBL-EBI	SRS001006	Host-associated
EMBL-EBI	SRS001007	Host-associated
EMBL-EBI	SRS001008	Host-associated
EMBL-EBI	SRS001009	Host-associated
EMBL-EBI	SRS001012	Host-associated
EMBL-EBI	SRS001013	Host-associated
EMBL-EBI	SRS001014	Host-associated
EMBL-EBI	SRS001015	Host-associated
EMBL-EBI	SRS001909	Aquatic
EMBL-EBI	SRS001911	Aquatic
EMBL-EBI	SRS001913	Aquatic
EMBL-EBI	SRS004796	Extreme
EMBL-EBI	SRS009545	Aquatic
EMBL-EBI	SRS009546	Aquatic
EMBL-EBI	SRS009547	Aquatic
EMBL-EBI	SRS009548	Aquatic
EMBL-EBI	SRS009549	Aquatic
EMBL-EBI	SRS009550	Aquatic
EMBL-EBI	SRS009551	Aquatic
EMBL-EBI	SRS009552	Aquatic
EMBL-EBI	SRS009553	Aquatic
EMBL-EBI	SRS009554	Aquatic
EMBL-EBI	SRS009825	Host-associated
EMBL-EBI	SRS009922	Terrestrial
EMBL-EBI	SRS010104	Virus-enriched
EMBL-EBI	SRS010106	Virus-enriched
EMBL-EBI	SRS010107	Aquatic
EMBL-EBI	SRS010108	Aquatic
EMBL-EBI	SRS010109	Aquatic
EMBL-EBI	SRS010110	Aquatic
EMBL-EBI	SRS010111	Aquatic
EMBL-EBI	SRS010112	Aquatic
EMBL-EBI	SRS010113	Aquatic
EMBL-EBI	SRS010114	Virus-enriched
EMBL-EBI	SRS010115	Virus-enriched
EMBL-EBI	SRS010116	Aquatic
EMBL-EBI	SRS010117	Aquatic
EMBL-EBI	SRS010118	Aquatic
EMBL-EBI	SRS010119	Aquatic
EMBL-EBI	SRS010120	Aquatic
EMBL-EBI	SRS010121	Aquatic
EMBL-EBI	SRS011748	Aquatic
EMBL-EBI	SRS070510	Host-associated
EMBL-EBI	SRS070511	Host-associated
EMBL-EBI	SRS070519	Host-associated
EMBL-EBI	SRS070520	Host-associated
EMBL-EBI	SRS070521	Host-associated
EMBL-EBI	SRS070522	Host-associated
EMBL-EBI	SRS070523	Host-associated
EMBL-EBI	SRS070524	Host-associated
EMBL-EBI	SRS070525	Host-associated
EMBL-EBI	SRS070526	Host-associated
EMBL-EBI	SRS070527	Host-associated
EMBL-EBI	SRS070528	Host-associated
EMBL-EBI	SRS070529	Host-associated
EMBL-EBI	SRS070530	Host-associated
EMBL-EBI	SRS070532	Host-associated
EMBL-EBI	SRS070533	Host-associated
EMBL-EBI	SRS070534	Host-associated
EMBL-EBI	SRS070535	Host-associated
EMBL-EBI	SRS070536	Host-associated
EMBL-EBI	SRS086438	Host-associated
EMBL-EBI	SRS086439	Host-associated
EMBL-EBI	SRS086440	Host-associated
EMBL-EBI	SRS086446	Host-associated
EMBL-EBI	SRS086447	Host-associated
EMBL-EBI	SRS086449	Host-associated
EMBL-EBI	SRS115001	Aquatic
EMBL-EBI	SRS115002	Aquatic
EMBL-EBI	SRS211739	Food
EMBL-EBI	SRS211740	Food
EMBL-EBI	SRS211741	Food
EMBL-EBI	SRS211742	Food
EMBL-EBI	SRS211743	Food
EMBL-EBI	SRS211744	Food
EMBL-EBI	SRS211745	Food
EMBL-EBI	SRS259449	Feces/GI tract
EMBL-EBI	SRS259477	Feces/GI tract
EMBL-EBI	SRS259478	Feces/GI tract
EMBL-EBI	SRS259484	Feces/GI tract
EMBL-EBI	SRS259485	Feces/GI tract
EMBL-EBI	SRS259486	Feces/GI tract
EMBL-EBI	SRS259496	Feces/GI tract
EMBL-EBI	SRS259499	Feces/GI tract
EMBL-EBI	SRS259502	Feces/GI tract
EMBL-EBI	SRS259507	Feces/GI tract
EMBL-EBI	SRS259508	Feces/GI tract
EMBL-EBI	SRS259509	Feces/GI tract
EMBL-EBI	SRS259510	Feces/GI tract
EMBL-EBI	SRS259511	Feces/GI tract
EMBL-EBI	SRS259512	Feces/GI tract
EMBL-EBI	SRS259513	Feces/GI tract
EMBL-EBI	SRS259514	Feces/GI tract
EMBL-EBI	SRS259515	Feces/GI tract
EMBL-EBI	SRS259516	Feces/GI tract
EMBL-EBI	SRS259517	Feces/GI tract
EMBL-EBI	SRS259518	Feces/GI tract
EMBL-EBI	SRS259519	Feces/GI tract
EMBL-EBI	SRS259520	Feces/GI tract
EMBL-EBI	SRS259521	Feces/GI tract
EMBL-EBI	SRS259522	Feces/GI tract
EMBL-EBI	SRS259523	Feces/GI tract
EMBL-EBI	SRS259524	Feces/GI tract
EMBL-EBI	SRS259525	Feces/GI tract
EMBL-EBI	SRS259526	Feces/GI tract
EMBL-EBI	SRS259527	Feces/GI tract
EMBL-EBI	SRS259528	Feces/GI tract
EMBL-EBI	SRS259529	Feces/GI tract
EMBL-EBI	SRS259530	Feces/GI tract
EMBL-EBI	SRS259531	Feces/GI tract
EMBL-EBI	SRS259532	Feces/GI tract
EMBL-EBI	SRS259533	Feces/GI tract
EMBL-EBI	SRS259534	Feces/GI tract
EMBL-EBI	SRS259535	Feces/GI tract
EMBL-EBI	SRS259536	Feces/GI tract
EMBL-EBI	SRS259537	Feces/GI tract
EMBL-EBI	SRS259538	Feces/GI tract
EMBL-EBI	SRS259539	Feces/GI tract
EMBL-EBI	SRS259540	Feces/GI tract
EMBL-EBI	SRS259541	Feces/GI tract
EMBL-EBI	SRS259542	Feces/GI tract
EMBL-EBI	SRS259543	Feces/GI tract
EMBL-EBI	SRS259544	Feces/GI tract
EMBL-EBI	SRS259545	Feces/GI tract
EMBL-EBI	SRS259546	Feces/GI tract
EMBL-EBI	SRS259547	Feces/GI tract
EMBL-EBI	SRS259548	Feces/GI tract
EMBL-EBI	SRS259550	Feces/GI tract
EMBL-EBI	SRS259551	Feces/GI tract
EMBL-EBI	SRS259552	Feces/GI tract
EMBL-EBI	SRS259554	Feces/GI tract
EMBL-EBI	SRS259555	Feces/GI tract
EMBL-EBI	SRS259556	Feces/GI tract
EMBL-EBI	SRS259557	Feces/GI tract
EMBL-EBI	SRS259558	Feces/GI tract
EMBL-EBI	SRS259559	Feces/GI tract
EMBL-EBI	SRS259560	Feces/GI tract
EMBL-EBI	SRS259561	Feces/GI tract
EMBL-EBI	SRS259562	Feces/GI tract
EMBL-EBI	SRS259563	Feces/GI tract
EMBL-EBI	SRS259564	Feces/GI tract
EMBL-EBI	SRS259565	Feces/GI tract
EMBL-EBI	SRS259566	Feces/GI tract
EMBL-EBI	SRS259567	Feces/GI tract
EMBL-EBI	SRS259568	Feces/GI tract
EMBL-EBI	SRS259569	Feces/GI tract
EMBL-EBI	SRS259570	Feces/GI tract
EMBL-EBI	SRS259571	Feces/GI tract
EMBL-EBI	SRS259573	Feces/GI tract
EMBL-EBI	SRS259574	Feces/GI tract
EMBL-EBI	SRS259575	Feces/GI tract
EMBL-EBI	SRS259576	Feces/GI tract
EMBL-EBI	SRS259577	Feces/GI tract
EMBL-EBI	SRS259578	Feces/GI tract
EMBL-EBI	SRS294812	Feces/GI tract
EMBL-EBI	SRS294813	Feces/GI tract
EMBL-EBI	SRS294814	Feces/GI tract
EMBL-EBI	SRS294815	Feces/GI tract
EMBL-EBI	SRS294816	Feces/GI tract
EMBL-EBI	SRS294817	Feces/GI tract
EMBL-EBI	SRS294818	Feces/GI tract
EMBL-EBI	SRS294819	Feces/GI tract
EMBL-EBI	SRS294820	Feces/GI tract
EMBL-EBI	SRS294821	Feces/GI tract
EMBL-EBI	SRS294822	Feces/GI tract
EMBL-EBI	SRS294823	Feces/GI tract
EMBL-EBI	SRS294824	Feces/GI tract
EMBL-EBI	SRS294825	Feces/GI tract
EMBL-EBI	SRS294826	Feces/GI tract
EMBL-EBI	SRS294827	Feces/GI tract
EMBL-EBI	SRS294828	Feces/GI tract
EMBL-EBI	SRS294829	Feces/GI tract
EMBL-EBI	SRS294830	Feces/GI tract
EMBL-EBI	SRS294831	Feces/GI tract
EMBL-EBI	SRS294832	Feces/GI tract
EMBL-EBI	SRS294833	Feces/GI tract
EMBL-EBI	SRS294834	Feces/GI tract
EMBL-EBI	SRS294835	Feces/GI tract
EMBL-EBI	SRS294836	Feces/GI tract
EMBL-EBI	SRS294837	Feces/GI tract
EMBL-EBI	SRS294838	Feces/GI tract
EMBL-EBI	SRS294839	Feces/GI tract
EMBL-EBI	SRS294840	Feces/GI tract
EMBL-EBI	SRS294841	Feces/GI tract
EMBL-EBI	SRS294842	Feces/GI tract
EMBL-EBI	SRS294843	Feces/GI tract
EMBL-EBI	SRS294844	Feces/GI tract
EMBL-EBI	SRS294845	Feces/GI tract
EMBL-EBI	SRS294846	Feces/GI tract
EMBL-EBI	SRS294847	Feces/GI tract
EMBL-EBI	SRS294848	Feces/GI tract
EMBL-EBI	SRS294849	Feces/GI tract
EMBL-EBI	SRS294850	Feces/GI tract
EMBL-EBI	SRS294851	Feces/GI tract
EMBL-EBI	SRS294852	Feces/GI tract
EMBL-EBI	SRS294853	Feces/GI tract
EMBL-EBI	SRS294854	Feces/GI tract
EMBL-EBI	SRS294855	Feces/GI tract
EMBL-EBI	SRS294856	Feces/GI tract
EMBL-EBI	SRS294857	Feces/GI tract
EMBL-EBI	SRS294858	Feces/GI tract
EMBL-EBI	SRS294859	Feces/GI tract
EMBL-EBI	SRS294860	Feces/GI tract
EMBL-EBI	SRS294861	Feces/GI tract
EMBL-EBI	SRS294862	Feces/GI tract
EMBL-EBI	SRS294863	Feces/GI tract
EMBL-EBI	SRS294864	Feces/GI tract
EMBL-EBI	SRS294866	Feces/GI tract
EMBL-EBI	SRS294867	Feces/GI tract
EMBL-EBI	SRS294868	Feces/GI tract
EMBL-EBI	SRS294869	Feces/GI tract
EMBL-EBI	SRS294870	Feces/GI tract
EMBL-EBI	SRS294871	Feces/GI tract
EMBL-EBI	SRS294872	Feces/GI tract
EMBL-EBI	SRS294873	Feces/GI tract
EMBL-EBI	SRS294874	Feces/GI tract
EMBL-EBI	SRS294875	Feces/GI tract
EMBL-EBI	SRS294876	Feces/GI tract
EMBL-EBI	SRS294878	Feces/GI tract
EMBL-EBI	SRS294879	Feces/GI tract
EMBL-EBI	SRS294880	Feces/GI tract
EMBL-EBI	SRS294881	Feces/GI tract
EMBL-EBI	SRS294882	Feces/GI tract
EMBL-EBI	SRS294883	Feces/GI tract
EMBL-EBI	SRS294884	Feces/GI tract
EMBL-EBI	SRS294885	Feces/GI tract
EMBL-EBI	SRS294886	Feces/GI tract
EMBL-EBI	SRS294887	Feces/GI tract
EMBL-EBI	SRS294888	Feces/GI tract
EMBL-EBI	SRS294889	Feces/GI tract
EMBL-EBI	SRS294890	Feces/GI tract
EMBL-EBI	SRS294891	Feces/GI tract
EMBL-EBI	SRS294892	Feces/GI tract
EMBL-EBI	SRS294893	Feces/GI tract
EMBL-EBI	SRS294894	Feces/GI tract
EMBL-EBI	SRS294895	Feces/GI tract
EMBL-EBI	SRS294896	Feces/GI tract
EMBL-EBI	SRS294897	Feces/GI tract
EMBL-EBI	SRS294898	Feces/GI tract
EMBL-EBI	SRS294899	Feces/GI tract
EMBL-EBI	SRS294900	Feces/GI tract
EMBL-EBI	SRS294901	Feces/GI tract
EMBL-EBI	SRS294902	Feces/GI tract
EMBL-EBI	SRS294903	Feces/GI tract
EMBL-EBI	SRS294904	Feces/GI tract
EMBL-EBI	SRS294905	Feces/GI tract
EMBL-EBI	SRS294906	Feces/GI tract
EMBL-EBI	SRS294907	Feces/GI tract
EMBL-EBI	SRS294908	Feces/GI tract
EMBL-EBI	SRS294909	Feces/GI tract
EMBL-EBI	SRS294910	Feces/GI tract
EMBL-EBI	SRS294911	Feces/GI tract
EMBL-EBI	SRS294912	Feces/GI tract
EMBL-EBI	SRS294913	Feces/GI tract
EMBL-EBI	SRS294914	Feces/GI tract
EMBL-EBI	SRS294915	Feces/GI tract
EMBL-EBI	SRS294916	Feces/GI tract
EMBL-EBI	SRS294917	Feces/GI tract
EMBL-EBI	SRS294918	Feces/GI tract
EMBL-EBI	SRS294919	Feces/GI tract
EMBL-EBI	SRS294920	Feces/GI tract
EMBL-EBI	SRS294921	Feces/GI tract
EMBL-EBI	SRS294922	Feces/GI tract
EMBL-EBI	SRS294923	Feces/GI tract
EMBL-EBI	SRS294924	Feces/GI tract
EMBL-EBI	SRS294925	Feces/GI tract
EMBL-EBI	SRS294926	Feces/GI tract
EMBL-EBI	SRS294927	Feces/GI tract
EMBL-EBI	SRS294928	Feces/GI tract
EMBL-EBI	SRS294929	Feces/GI tract
EMBL-EBI	SRS294930	Feces/GI tract
EMBL-EBI	SRS294931	Feces/GI tract
EMBL-EBI	SRS294932	Feces/GI tract
EMBL-EBI	SRS294933	Feces/GI tract
EMBL-EBI	SRS294935	Feces/GI tract
EMBL-EBI	SRS294936	Feces/GI tract
EMBL-EBI	SRS294937	Feces/GI tract
EMBL-EBI	SRS294938	Feces/GI tract
EMBL-EBI	SRS294939	Feces/GI tract
EMBL-EBI	SRS294940	Feces/GI tract
EMBL-EBI	SRS294941	Feces/GI tract
EMBL-EBI	SRS294942	Feces/GI tract
EMBL-EBI	SRS294943	Feces/GI tract
EMBL-EBI	SRS294944	Feces/GI tract
EMBL-EBI	SRS294945	Feces/GI tract
EMBL-EBI	SRS294946	Feces/GI tract
EMBL-EBI	SRS294947	Feces/GI tract
EMBL-EBI	SRS294948	Feces/GI tract
EMBL-EBI	SRS294949	Feces/GI tract
EMBL-EBI	SRS294950	Feces/GI tract
EMBL-EBI	SRS294951	Feces/GI tract
EMBL-EBI	SRS294952	Feces/GI tract
EMBL-EBI	SRS294953	Feces/GI tract
EMBL-EBI	SRS294954	Feces/GI tract
EMBL-EBI	SRS294956	Feces/GI tract
EMBL-EBI	SRS294957	Feces/GI tract
EMBL-EBI	SRS294958	Feces/GI tract
EMBL-EBI	SRS294959	Feces/GI tract
EMBL-EBI	SRS294960	Feces/GI tract
EMBL-EBI	SRS294961	Feces/GI tract
EMBL-EBI	SRS294962	Feces/GI tract
EMBL-EBI	SRS294963	Feces/GI tract
EMBL-EBI	SRS294964	Feces/GI tract
EMBL-EBI	SRS294965	Feces/GI tract
EMBL-EBI	SRS294966	Feces/GI tract
EMBL-EBI	SRS294967	Feces/GI tract
EMBL-EBI	SRS294968	Feces/GI tract
EMBL-EBI	SRS294969	Feces/GI tract
EMBL-EBI	SRS294970	Feces/GI tract
EMBL-EBI	SRS294971	Feces/GI tract
EMBL-EBI	SRS294972	Feces/GI tract
EMBL-EBI	SRS294973	Feces/GI tract
EMBL-EBI	SRS294974	Feces/GI tract
EMBL-EBI	SRS294975	Feces/GI tract
EMBL-EBI	SRS294976	Feces/GI tract
EMBL-EBI	SRS294977	Feces/GI tract
EMBL-EBI	SRS294978	Feces/GI tract
EMBL-EBI	SRS294979	Feces/GI tract
EMBL-EBI	SRS294980	Feces/GI tract
EMBL-EBI	SRS294981	Feces/GI tract
EMBL-EBI	SRS294982	Feces/GI tract
EMBL-EBI	SRS294983	Feces/GI tract
EMBL-EBI	SRS294984	Feces/GI tract
EMBL-EBI	SRS294985	Feces/GI tract
EMBL-EBI	SRS294986	Feces/GI tract
EMBL-EBI	SRS294987	Feces/GI tract
EMBL-EBI	SRS294988	Feces/GI tract
EMBL-EBI	SRS294989	Feces/GI tract
EMBL-EBI	SRS294990	Feces/GI tract
EMBL-EBI	SRS294991	Feces/GI tract
EMBL-EBI	SRS294992	Feces/GI tract
EMBL-EBI	SRS294993	Feces/GI tract
EMBL-EBI	SRS294994	Feces/GI tract
EMBL-EBI	SRS294995	Feces/GI tract
EMBL-EBI	SRS294996	Feces/GI tract
EMBL-EBI	SRS294997	Feces/GI tract
EMBL-EBI	SRS294998	Feces/GI tract
EMBL-EBI	SRS294999	Feces/GI tract
EMBL-EBI	SRS295000	Feces/GI tract
EMBL-EBI	SRS295001	Feces/GI tract
EMBL-EBI	SRS295002	Feces/GI tract
EMBL-EBI	SRS295003	Feces/GI tract
EMBL-EBI	SRS295004	Feces/GI tract
EMBL-EBI	SRS295005	Feces/GI tract
EMBL-EBI	SRS295006	Feces/GI tract
EMBL-EBI	SRS295007	Feces/GI tract
EMBL-EBI	SRS295008	Feces/GI tract
EMBL-EBI	SRS295009	Feces/GI tract
EMBL-EBI	SRS295010	Feces/GI tract
EMBL-EBI	SRS295011	Feces/GI tract
EMBL-EBI	SRS295012	Feces/GI tract
EMBL-EBI	SRS295013	Feces/GI tract
EMBL-EBI	SRS295014	Feces/GI tract
EMBL-EBI	SRS295015	Feces/GI tract
EMBL-EBI	SRS295016	Feces/GI tract
EMBL-EBI	SRS295017	Feces/GI tract
EMBL-EBI	SRS295018	Feces/GI tract
EMBL-EBI	SRS295019	Feces/GI tract
EMBL-EBI	SRS295020	Feces/GI tract
EMBL-EBI	SRS295021	Feces/GI tract
EMBL-EBI	SRS295022	Feces/GI tract
EMBL-EBI	SRS295023	Feces/GI tract
EMBL-EBI	SRS295024	Feces/GI tract
EMBL-EBI	SRS295025	Feces/GI tract
EMBL-EBI	SRS295026	Feces/GI tract
EMBL-EBI	SRS295027	Feces/GI tract
EMBL-EBI	SRS295028	Feces/GI tract
EMBL-EBI	SRS295029	Feces/GI tract
